# Supplementary material
Source: Research Square preprint supplement (doi:10.21203/rs.3.rs-9025606/v1)
Supplement: Supplementary file 1 [file 4c24209367d2f86e342c4f4d.docx]

**ONLINE DATA SUPPLEMENT**

**Mitochondrial Ca2+ uptake affects contractile properties in streptozotocin-induced diabetic rat myocardium**

Haruka Sato, MD, PhD, Sana Koyama, Ayana Matsumoto, Shiori Akazawa, Kao Takeda, Karin Yamamoto, Tsuyoshi Okumura, Masahito Miura, MD, PhD

Department of Clinical Physiology, Health Science, Tohoku University Graduate School of Medicine, Sendai 980-8574, Japan

**Expanded MATERIALS and METHODS**

**Animal model**

All animal procedures were performed in accordance with the NIH guidelines (Guide for the care and use of laboratory animals) and were approved by the Ethics Review Board of Tohoku University (approval reference number: 2019MdA-026-09). Sprague-Dawley rats weighing 180 g received a single subcutaneous injection of 0.5 mL of 55 mg/kg streptozotocin (STZ rats) or an equal volume of vehicle (Ctr rats) [4]. Six weeks after injection, rats were anesthetized with intraperitoneal injection of butorphanol tartrate (2.5 mg/kg), midazolam (2 mg/kg), and medetomidine chloride (0.15 mg/kg). Adequate anesthesia was confirmed by the absence of pedal withdrawal and other responses to pinching of the tail, toes, and ears. Respiration and heart rates were monitored throughout the procedure; increases in these parameters were considered to indicate that anesthesia was insufficient. After measurement of body weight,hearts were rapidly excised, weighed, and used for subsequent experiments, as previously described [8, 9, 10]. Removal of the heart for dissection under sufficiently deep anesthesia resulted in euthanasia.

**Dissection of rat hearts**

Immediately after excision, coronary arteries were perfused via the aorta with a HEPES buffered solution containing 15 mM KCl. Trabeculae (length: 2.1 ± 0.2 mm, width: 243 ± 61µm, thickness: 98 ± 7 µm under slack conditions)were dissected from the right ventricle and mounted horizontally between a force transducer and a micromanipulator ina bath on an inverted microscope (Nikon, Japan), as previously reported [8, 9, 10]. Preparations were stimulated at 0.5 Hz with 5-ms pulses delivered through parallel silver electrodes at 50% above threshold and superfused with the HEPES-buffered solution at room temperature (24°C). The HEPES solution contained (mM): 130.8 NaCl, 5 KCl, 1.2 MgCl2, 2.8 acetate, 10 HEPES, 10 glucose, and 0.7 CaCl2; pH 7.4 (adjusted with NaOH). The solution was continuously bubbled with 100% O2.

**Measurement of force**

Force of trabeculae was measured using a silicon strain gauge (model AE-801, Kronex Technologies, USA) and recorded on a personal computer via a data acquisition system (PowerLab, ADInstruments). The peak force (Forcepeak) was measured during 0.5 Hz electrical stimulation at 0.7 and 2.0 mM [Ca2+]o (22ºC). The maximal contraction velocity (dF/dtmax) and minimal relaxation velocity (dF/dtmin) were calculated and normalized to developed force amplitude (Fig. S1).

**Fura-2 loading and measurement of fluorescence**

Intracellular calcium ([Ca2+]i) was measured as previously described [8, 9, 10]. Microelectrodes were filled with 1 mM fura-2 pentapotassium salt (Molecular Probes, Eugene, OR), with remainder filled with 3 mM KCl. Microelectrode resistance was 150-250 MΩ. Membrane potentials ranging from -40 to -80 mV were monitored using an intracellular amplifier (MEZ-8201, Nihon Koden, Japan). Fura-2 was microinjected electrophoretically (-5 to -10 nA, 10 min), allowing diffusion throughout the trabecula from cell to cell via gap junctions. Preparations were then stimulated at 1 Hz for 30-60 min until fura-2 fluorescence became uniform. Impalement was repeated 2-6 times near both ends of the trabecula until fluorescence intensity exceeded autofluorescence by at least twofold.

Fura-2 fluorescence was excited using a 100-W Xenon arc lamp (c6979, Hamamatsu, Japan) at 340 and 380 nm (band width: 10 nm) and collected through a 490-530 nm emission filter (Nikon, Japan) using a photomultiplier tube (PMT; E1341 with a C1556 socket, Hamamatsu, Japan). Signals were digitized using a 16-bit data acquisition system (PowerLab, ADInstruments). Fluorescence ratio (R340/380) was used to estimate [Ca2+]i according to Grynkiewicz et al. [5] after subtraction of the autofluorescence:

[Ca2+]i = Kd×β( R340/380-Rmin)/(Rmax- R340/380)

where Kd is the effective dissociation constant, Rmin is R340/380 at zero [Ca2+], Rmax is R340/380 at a saturating [Ca2+], and β is the ratio of fluorescence value for Ca2+-free dye to that for Ca2+-bound dye at 380 nm excitation. These parameters were determined in vitro (Rmin = 0.152, Rmax = 4.60, Kd = 361 nM, β = 9.18), consistent with previous data from this laboratory [6, 7].

**Measurements of rhod-2 fluorescence in trabeculae**

Trabeculae were loaded with 10 µM rhod-2 AM for 30 minutes and superfused with HEPES buffered-solution for 1.5 hours at 30-35ºC [2]. Rhod-2 was excited at 515-555 nm and collected at 573-613 nm using a PMT at 0.7 and 2.0 mM [Ca2+]o (22ºC) [3]. The effect of Ru360 and spermine on rhod-2 fluorescence was recorded.

**Measurements of MitoSoxRed fluorescence in trabeculae**

Trabeculae were loaded with 0.4 µM MitoSOX Red for 60 minutes and superfused with HEPES buffered-solution for 1 hour at 30-35ºC [1]. To investigate the level of ROS production within mitochondria, MitoSoxRed was excited at 465-495 nm and collected at 573-613 nm using a PMT (22ºC). MitoSoxRed fluorescence was measured before (Fl) and after addition of 10 mM H2O2 (FlH2O2). The ratio of Fl to FlH2O2 was used to estimate basal ROS production within mitochondria [3].

**Measurements of rhod-2, MitoSOX Red, and MitoTracker Green** **fluorescence using confocal microscopy**

After loading with rhod-2 or MitoSox Red, trabeculae were co-loaded with MitoTracker Green [3], and mitochondrial localization was confirmed by confocal microscopy, as previously described [11]. Fluorescence images were obtained using a resonance-scanning confocal microscope (Model A1R, Nikon, Japan) equipped with a 60x oil immersion objective (NA:1.4). Rhod-2 was excited at 561 nm and collected at 570-620 nm. MitoSoxRed was excited at 488 nm and collected at 570-620 nm. MitoTracker Green was excited at 488 nm and collected at 500-550 nm. Images were averaged 4 times [11].

**Data acquisition**

Force and fluorescence signals were recorded using a 16-bit data acquisition system with a sampling rate of 400 Hz (PowerLab, ADInstruments).

**Western blot analysis (Fig. S2)**

Hearts were minced on ice, and proteins were extracted using a MinuteTM total protein extraction kit (Invent Biotechnologies, Inc.). Equal amounts of protein were separated by SDS-PAGE gel (Bio-Rad, USA) and transferred to PVDF membranes (Bio-Rad, USA). Membranes were blocked for 5 minutes at room temperature (Bio-Rad blocking Buffer) and incubated with primary antibodies against MCU (STJ118714, St John’s, UK) and β-actin (A2066, Sigma-Aldrich, USA). Bands were visualized using LuminataTM Forte Western HRP Substrate (Merck Millipore, USA), imaged with ChemiDoc Touch MP (Bio-Rad, UA), and analyzed using ImageLab software (Bio-Rad) [9].

**REFERENCES**

1. Andersson DC, Fauconnier J, Yamada T, Lacampagne A, Zhang SJ, Katz A, Westerblad H (2011) Mitochondrial production of reactive oxygen species contributes to the β-adrenergic stimulation of mouse cardiomyocytes. J Physiol 589:1791-1801. doi: 10.1113/jphysiol.2010.202838
2. Brandes R, Bers DM (2002) Simultaneous measurements of mitochondrial NADH and Ca2+ during increased work in intact rat heart trabeculae. Biophys J 83:587-604. doi: 10.1016/S0006-3495(02)75194-1
3. Cottet-Rousselle C, Ronot X, Leverve X, Mayol J F (2011) Cytometric assessment of mitochondria using fluorescent probes. Cytometry A 79:405-425. doi: 10.1002/cyto.a.21061
4. Ghasemi A, Jeddi S (2023) Streptozotocin as a tool for induction of rat models of diabetes: a practical guide. EXCLI J 22:274-294. doi: 10.17179/excli2022-5720
5. Grynkiewicz G, Poenie M, Tsien RY (1985) A new generation of Ca2+ indicators with greatly improved fluorescence properties. J Biol Chem 260:3440-3450.
6. Miura M, Boyden PA, ter Keurs HEDJ (1998) Ca2+ waves during triggered propagated contractions in intact trabeculae. Am J Physiol 274:H266-H276. doi:10.1152/ajpheart.1998.274.1.H266
7. Miura M, Nishio T, Hattori T, Murai N, Stuyvers BD, Shindoh C, Boyden PA (2010) Effect of nonuniform muscle contraction on sustainability and frequency of triggered arrhythmias in rat cardiac muscle. Circulation 121:2711-2717. doi:10.1161/CIRCULATIONAHA.109.907717
8. Miura M, Handoh T, Taguchi Y, Hasegawa, T, Takahashi Y, Morita N, Matsumoto A, Shindoh C, Sato H (2020) Transient elevation of glucose increases arrhythmia susceptibility in non-diabetic rat trabeculae with nonuniform contraction. Circ J 84:551-558. doi:10.1253/circj.CJ-19-0715
9. Miura M, Hasegawa T, Matsumoto A, Nishiyama M, Someya Y, Satoh W, Kumasaka K, Shindoh C, Sato H (2021) Effect of transient elevation of glucose on contractile properties in non-diabetic rat cardiac muscle. Heart Vessels 36:568-576. doi:10.1007/s00380-020-01726-6
10. Sato H, Nagano T, Satoh W, Kumasaka K, Shindoh C, Miura M (2022) Roles of stretch-activated channels and NADPH oxidase 2 in the induction of twitch contraction by muscle stretching in rat ventricular muscle. Pflügers Arch 474:355-363. doi:10.1007/s00424-021-02657-5
11. Sato H, Nishiyama M, Morita N, Satoh W, Hasegawa T, Someya Y, Okumura T, Koyama S, Shindoh C, Miura M (2023) Mitochondrial connexin43 and mitochondrial KATP channels modulate triggered arrhythmias in mouse ventricular muscle. Pflügers Arch 475:477-488. doi:10.1007/s00424-023-02789-w

**Figure S1.**

**A.** Summary data of peak force (Forcepeak, left panel), maximal velocity of contraction (dF/dtmax, middle panel), and minimal velocity of relaxation (dF/dtmin, right panel) at 2.0 mM [Ca2+]o in Ctr and STZ rats (0.5 Hz electrical stimulation). **p<0.01 vs Ctr

**B.** Summary data of dF/dtmax (left panel) and dF/dtmin (right panel) normalized by their Forcepeak at 2.0 mM [Ca2+]o in Ctr and STZ rats (0.5 Hz electrical stimulation). *p<0.05 vs Ctr

**Figure S2.**
